# Supplementary material for: Characterization of the T‐cell receptor beta chain repertoire in tumor‐infiltrating lymphocytes
Source: PubMed Central journal article supplement (PMC5055180; doi:10.1002/cam4.828), 2016-07-27
Supplement: CAM4-5-2513-s001.pdf [file CAM4-5-2513-s001.pdf]

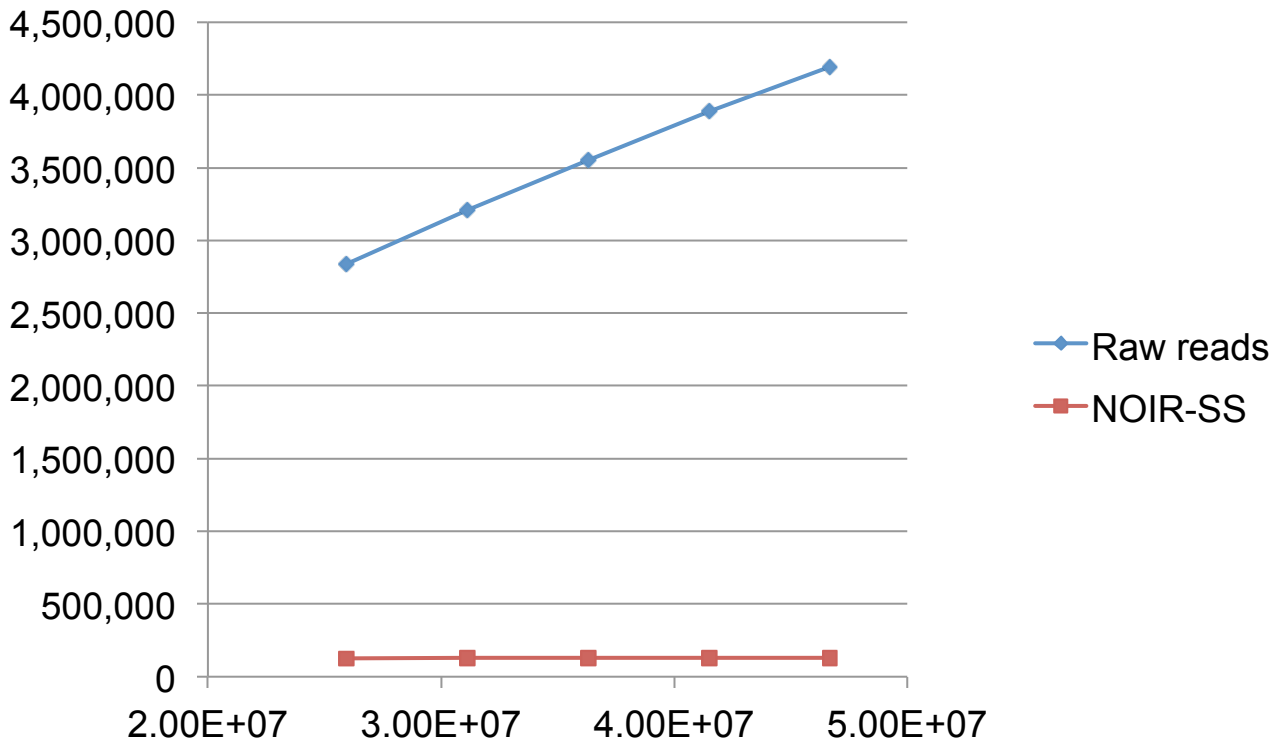

Figure S1. Comparison of conventional massively parallel sequencing and NOIR-SS for the estimation of TCRB nucleotide (nt) repertoire sizes. Horizontal axis, numbers of reads used for estimation. Vertical axis, number of TCRB CDR3 nt sequences identified.
